# Supplementary material
Source: PubMed Central journal article supplement (PMC2546899)
Supplement: supp_82_18_9008__1.pdf [file supp_82_18_9008__1.pdf]

## Supplementary data

**Table 1S**

AF011751, HEC278830, HPCHCJ1, AF511948, HPCPLYPRE, AF511949, AF511950, AF207754, AB049091, HPCCGENOM, HPCJCG, AF207753, AB049088, AF207752, HPCUNKCDS, AY460204, HPVHCVN, AF207758, AF054250, AF207756, AF207767, AB049097, AB049100, AB080299, D85516, AF207763, AF165060, HCU01214, D11355, D89872, AF207762, AF207765, AF207770, AY045702, AF207759, AF165062, AF165058, AF165050, AY587844, AF165052, AF207772, AF207769, AB049099, HPCJRNA, AB049093, HPCHUMR, AF207774, AF139594, AB049098, HPCRNA, AF207766, AB049101, AF208024, HPCK1R1, HPCGENANT, AF176573, AF356827, HCVPOLYP, AF207761, AF313916, AJ238800, AB049090, AF207760, HPCK1R2, AF207764, HCVJK1G, AB191333, HPCPP, D89815, AF165064, AF165056, AB049096, AB016785, AF165048, AF207773, AB049095, AF207771, AF207757, AF165046, AB049094, AF165054, AB049087, AF207768, AB049092, AB049089, D50484, AJ132997, HCV132996, HCU45476, AF483269, HPCJ491, AF165059, HPCJTA, AF165061, AF165057, AF165049, AF165051, HCJ238799, AF165063, AF165055, AF165047, AF207755, AF165045, AF165053, HPCK1R3, AJ851228, AY651061, AY051292, HPCCGS, AF290978, AF271632, AB047639, AY746460, AB047642, AB047643, AF238483, AB047640, AF238481, AF169005, AF169002, AF169004, AB047644, AF238485, AF238484, AF169003, AB047645, AF238482, AB047641, AF177036, HPCPOLP, AB031663, DQ155561, D50409, AY232733, AY232747, AB030907, AY232749, AY232743, AY232735, AY232731, AF238486, AY232741, AY232739, AY232737, AY232745, HPCJ8G, DQ437509, HCVCEMS1, AF046866, HPCEGS, HPCK3A, HPCJK049E, HPCFG, DQ418785, DQ418782, DQ418787, DQ516084, DQ418789, DQ418783, DQ418788, DQ418784, HCV4APOLY, DQ516083, DQ418786, AF064490, HCV1480, DQ278894, DQ278893, DQ278891, D84264, D84265, DQ314806, HPCJK046E, DQ278892, DQ314805, D84263, D84262, DQ480524, DQ480523, DQ480513, DQ480515, DQ480521, DQ480519, AY859526, HCV12083, DQ480518, DQ480520, DQ480516, DQ480522, DQ480512, DQ480517, DQ480514
